# Supplementary material
Source: publisher site journal article supplement (https://www.dovepress.com/article/576517)
Supplement: Supplementary file 1 [file supplementary%20table.docx]

**Table S1. Annual distribution of multidrug-resistant organisms (MDRO) among major bacterial isolates**

| MDRO (%) | 2021 | 2022 | 2023 | 2024 |
| --- | --- | --- | --- | --- |
| *A. baumannii* | 50.00 | 88.00 | 95.00 | 86.00 |
| *E. coli* | 46.00 | 29.00 | 33.00 | 33.00 |
| *K. pneumoniae* | 36.00 | 32.00 | 24.00 | 60.00 |
| *E. faecalis* | 0.00 | 60.00 | 27.00 | 25.00 |
| *S. aureus* | 40.00 | 44.00 | 86.00 | 100.00 |
| *E. faecium* | 50.00 | 75.00 | 69.00 | 46.00 |
| *P. aeruginosa* | 17.00 | 17.00 | 50.00 | 20.00 |
